# Supplementary material
Source: PubMed Central journal article supplement (PMC4926975)

## Supplemental Data

### Allograft outcomes by patients having EM compared with those patients who did not have EM examination.

There was no difference in patient survival between EM+ and EM- patients, with a survival of 84.4% and 88.8% respectively,  $p=0.40$ . Patients who had EM examination had significantly lower allograft survival than those patients who did not. Censored allograft survival in the EM+ and EM- patients was 61.6% and 90.0% respectively,  $p<0.0001$  as shown in figure 1.

**Figure 1.** Censored allograft survival in the EM+ and EM- patients.

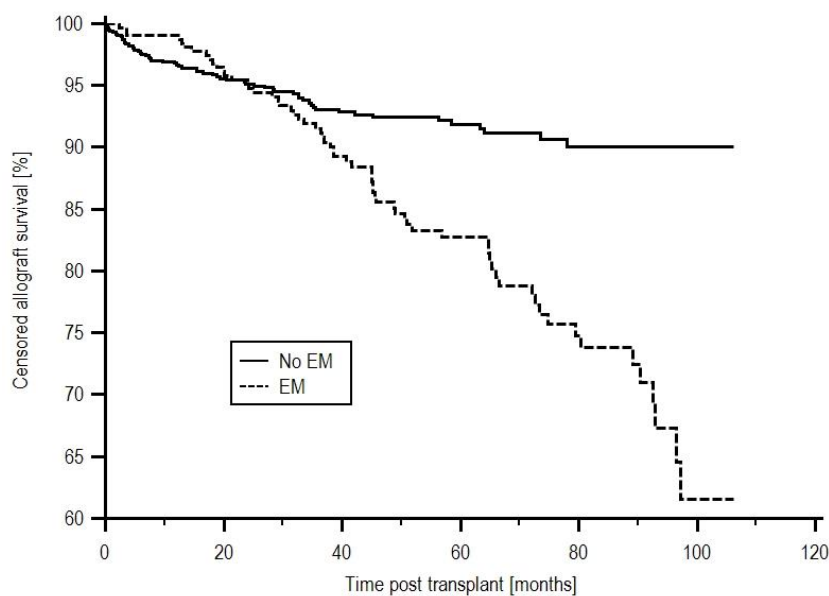

Patients who had EM were more likely to have experienced acute rejection and have developed TG. Rejection free survival in the EM+ and EM- patients was 55.8% and 78.2% respectively,  $p<0.001$  and TG free survival was 79.2% and 98.5% respectively,  $p<0.001$ .

## Allograft function and proteinuria

**Figure 1. Allograft function from time of index biopsy between the TRI+ and TRI- patients.**

There was no significant difference at any time point.

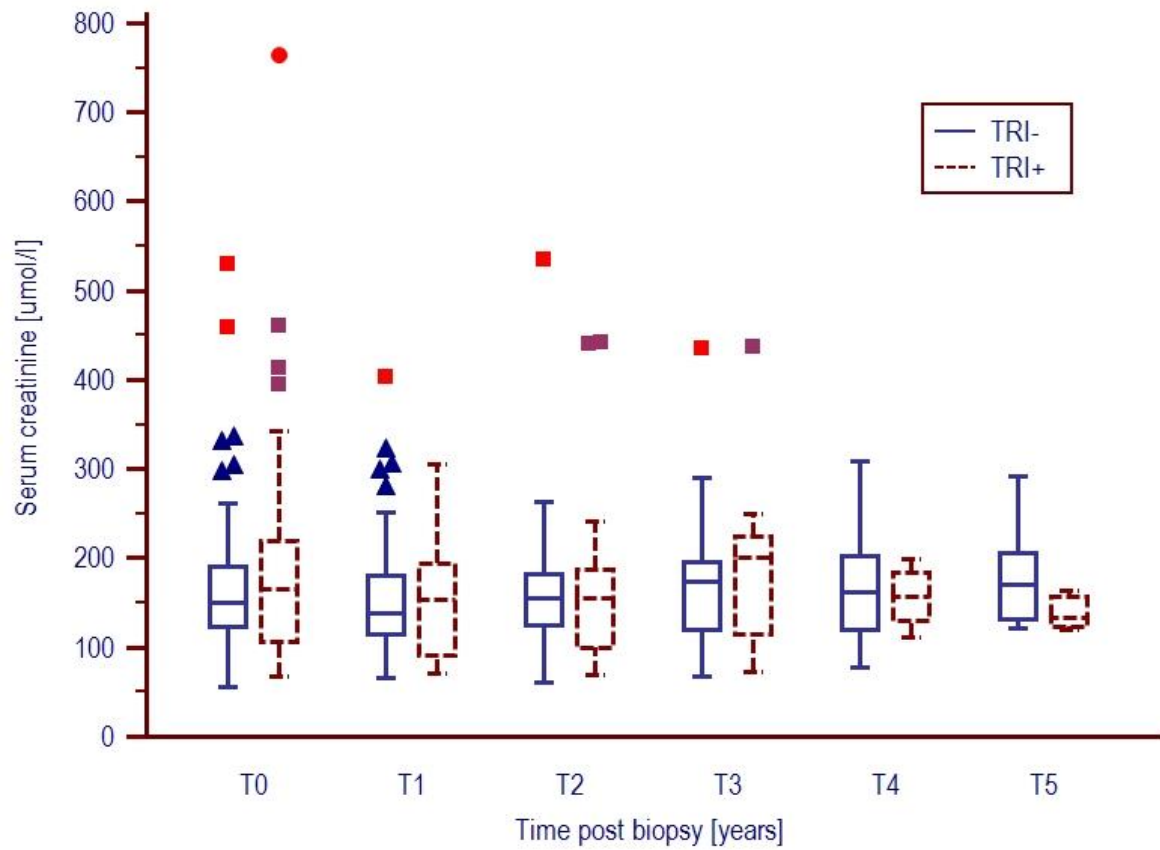

**Figure 2. Proteinuria, measured by protein creatinine ratio, between the TRI+ and TRI- patients**

There was no significant difference at any time point.

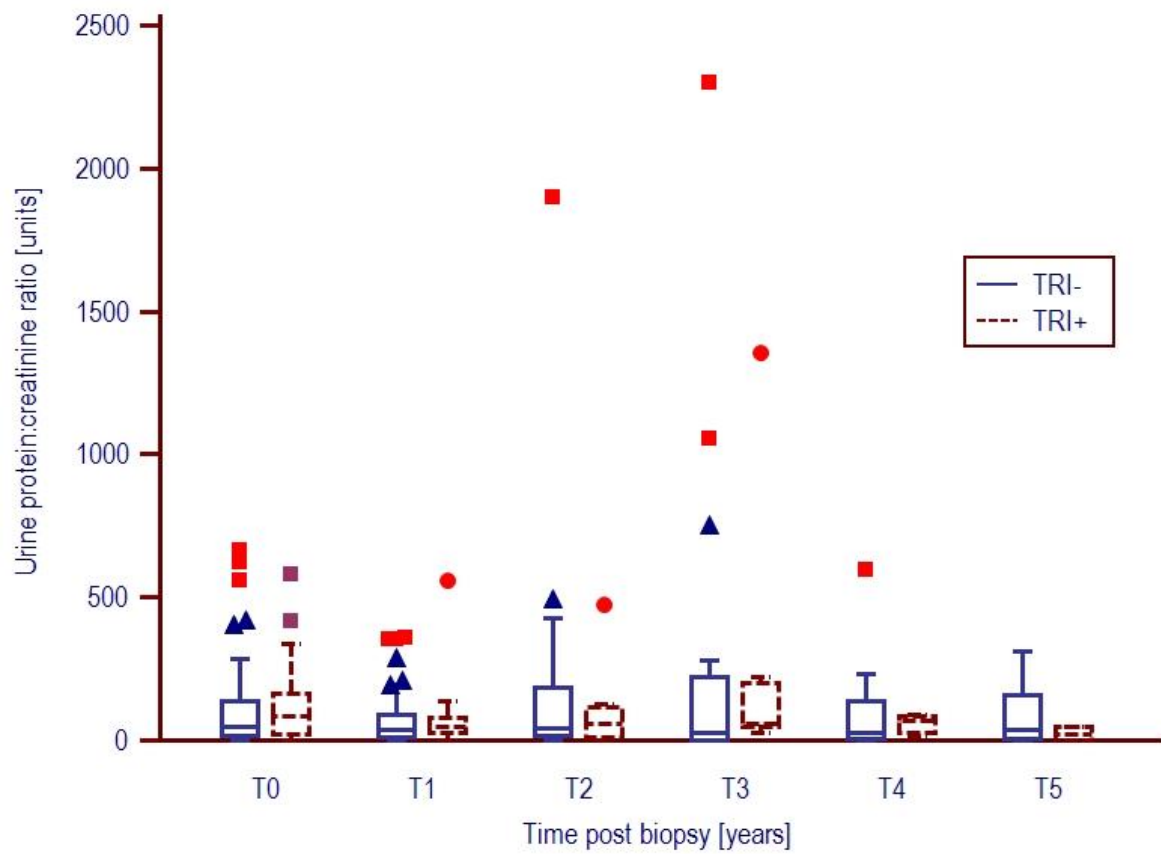

Supplement: ASN.2015050478_ASN2015050478SupplementaryData.pdf [file ASN.2015050478_ASN2015050478SupplementaryData.pdf]
